# Supplementary material
Source: PubMed Central journal article supplement (PMC4248793)
Supplement: JB.02055-14_zjb999093354so1.pdf [file JB.02055-14_zjb999093354so1.pdf]

Supplementary Table (Table S1) for:

CcpA-Mediated Catabolite Activation of the *Bacillus subtilis ilv-leu* Operon and  
Its Negation by Either CodY- or TnrA-Mediated Negative Regulation

Yasutaro Fujita, Takenori Satomura, Shigeo Tojo and Kazutake Hirooka

**Table S1.** Primers used in this study

| Primer       | Sequence                                                    |
|--------------|-------------------------------------------------------------|
| codY-F       | gtttaggaggattat <u>ttcatatgg</u> ctttat <sup>a</sup>        |
| codY-R       | gggttcttt <u>ggatc</u> cttaatgagattttag                     |
| tnrA-F       | agacatccaggggtgga <u>catatg</u> accacag                     |
| tnrA-R       | agccggac <u>ggatc</u> ctatttaacggttttg                      |
| ptsH-F       | aggagaatgata <u>catatg</u> gcaca                            |
| ptsH-R       | <u>tgatc</u> cttgcattactgccgagtccttc                        |
| hprK-F       | at <u>catatg</u> gcaaaggttcgcaaaaagacg <sup>b</sup>         |
| hprK-R       | taac <u>ggatc</u> ctcctattcttcttgcacc                       |
| D-248F       | gcgcgcgct <u>ctagat</u> gatctgtcagactcaatc                  |
| D+26R        | gcatgcgc <u>ggatc</u> cgtagagcttgcatttatctt                 |
| ilv-cre-d11F | gcgtatacaatatagattgattaataataat <u>tttaaaaaatgctg</u> ttgac |
| ilv-cre-d11R | gtcaacagcattttttaaaattattattaatcaatctatattgtatacgc          |
| ilv-cre-d16F | aagcgtatacaatatagattgatttaat <u>tttaaaaaatgctg</u> ttgacac  |
| ilv-cre-d16R | gtgtcaacagcattttttaaaattaaatcaatctatattgtatacgcctt          |
| ilv-cre-d21F | gaaagcgtatacaatatagattgattttaaa <u>aaatgctg</u> ttgacactg   |
| ilv-cre-d21R | cagtgcaacagcattttttaaaatcaatctatattgtatacgccttc             |
| ilv-cre-d32F | caataatgaaagcgtatacaatataaaaaatgctg <u>ttgacactg</u> cgt    |
| ilv-cre-d32R | acgcagtggaacagcattttttatattgtatacgccttcattattg              |
| ilv-i11F     | ctggtgtattcttgatagattataaaaact <u>tttaacatt</u> gc          |
| ilv-i11R     | gcaaatgttaaagttttataaatctatcaagaatacaccag                   |
| ilv-i16F     | aaataattctggtgtattcttgattataaaaact <u>tttaacatt</u> gcaatt  |
| ilv-i16R     | aattgcaaatgttaaagttttataatcaagaatacaccagaattattt            |
| ilv-i32F     | taaataattctggtgtattcttaacattgcaattccttt                     |
| ilv-i32R     | aaaggaattgcaaatgttaagaatacaccagaattattta                    |
| ilv-i42F     | tatataaaattaataattctggtgattgcaattcctttgtacc                 |
| ilv-i42R     | ggtacaaaaggaattgcaaatcaccagaattatttaattttatata              |

ilv-i53F      tatataaaattaaataattcaattcctttgtaccaataatgaaag  
 ilv-i53R      ctttcattattggtacaaaaggaattgaattatthaattttatata  
 ilv-i63F      tcttccatgtttatataaaaattaaatcctttgtaccaataatgaaageg  
 ilv-i63R      cgctttcattattggtacaaaagatttaattttatataaacatggaaga  
 FP-F          gatctgtcagactcaatc  
 FP-R          gtgaagcttgcatttatctt  
 cat/lac-F      tgtaaaacgacggccagttaaaggatttgagcgtagcgaa  
 cat/lac-R      caggaaacagctatgacctgcgggcctcttcgctatta  
 D2-F          taaaagttttataatttttttattatcaagaatacaccagaattattha  
 D2-R          taaataattctggtgtattcttgataataaaaaaattataaaaaactthta  
 D1-F          gttttataatttttttattaatctgaatacaccagaattatthaattht  
 D1-R          aaaattaaataattctggtgtattcagattaataaaaaaattataaaaaac  
 U0-F          tataatttttttattaatctatcaacaccagaattatthaattttatata  
 U0-R          tatataaaattaaataattctggtgttgatagattaataaaaaaattata  
 U1-F          tttttttattaatctatcaagaatagaattatthaattttatataaaca  
 U1-R          tgtttatataaaattaaataattctattcttgatagattaataaaaaaa  
 U2-F          ttattaatctatcaagaatacacaatttaattttatataaacatggaa  
 U2-R          ttccatgtttatataaaattaaattggtgtattcttgatagattaataa  
 U3-F          aatctatcaagaatacaccagaattatthttatataaacatggaagattt  
 U3-R          aaatcttccatgtttatataaaataattctggtgtattcttgatagatt  
 U4-F          atcaagaatacaccagaattatthaataaacatggaagattttataaca  
 U4-R          tgttataaaatcttccatgtttattaataattctggtgtattcttgat  
 U5-F          atacaccagaattatthaattttattggaagattttataaacacgatatg  
 U5-R          catatcgtgttataaaatcttccaataaaattaaataattctggtgtat  
 C1-F( $\Delta$ acatt)    aataaaaaaattataaaaaacttttatgcaattcctttgtaccaataatg  
 C1-R( $\Delta$ acatt)    cattattggtacaaaaggaattgcataaaagttttataatthttttatt  
 C2-F( $\Delta$ tttta)    agattaataaaaaaattataaaaacacatttgcaattcctttgtaccaa  
 C2-R( $\Delta$ tttta)    ttggtacaaaaggaattgcaaatgtgtttttataatthttttattaatct  
 Fd-140        gcgcgcgctctagaattataaaaaacttttaacat

Fd-130      gcgcgcgctctagaacttttaacatttgaatt

Fd-120      gcgcgcgctctagatttgcaattccttttgta

Fd-110      gcgcgcgctctagactttgtaccaataatga

---

<sup>a</sup> Restriction enzyme sites are underlined.

<sup>b</sup> The boldface “**a**” was introduced in place of “g” to produce an ATG start codon.
